# Supplementary material for: Drainage rearrangement in an intra-continental mountain belt: a case study from the central South Tian Shan, Kyrgyzstan
Source: Copernicus journal article supplement (doi:10.5194/esurf-12-973-2024), 2024-09-06
Supplement: Supplementary file [file esurf-12-973-2024-supplement-title-page.pdf › esurf-12-973-2024-supplement-title-page.pdf]

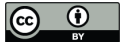

## *Supplement of*

# **Drainage rearrangement in an intra-continental mountain belt: a case study from the central South Tian Shan, Kyrgyzstan**

**Lingxiao Gong et al.**

*Correspondence to:* Lingxiao Gong ([gong@uni-potsdam.de](mailto:gong@uni-potsdam.de))

- [esurf-12-973-2024-supplement-title-page.pdf](#)
- [02\\_Supplementary\\_version4](#)
  - [02\\_Supplementary](#)
    - \* [02\\_Supplemen\\_2.txt](#)
    - \* [02\\_Supplement\\_1.docx](#)

The copyright of individual parts of the supplement might differ from the article licence.
